# Supplementary material
Source: Springer Nature journal article supplement (https://www.springermedizin.de/resource/supplementary/12943_2014_1285_MOESM7_ESM.pdf/9553146)
Supplement: MOESM7 [file 9553146]

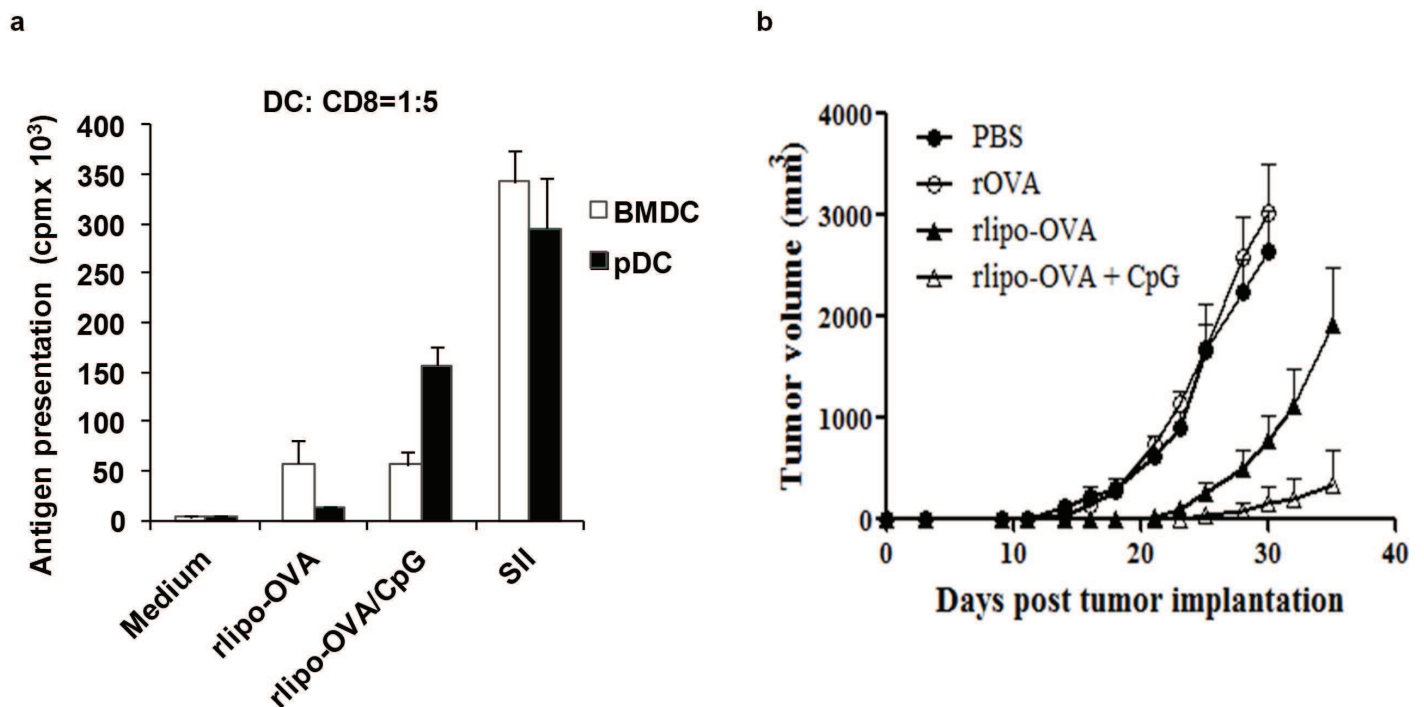

**Figure S7: TLR9 agonist CpG enhanced anti-tumor effects and antigen presentation of recombinant lipopeptide.** (a) BMDCs or pDCs were pulsed with rIipo-OVA(100 nM) in the presence or absence of CpG (100 nM) for 18 hr. Purity > 90%. The CD8<sup>+</sup> cells isolated from OT-1 mice (purity > 90 %) were cultured with protein-pulsed DCs in the ratio 5:1 for 72 hr. T cell proliferation was determined by [<sup>3</sup>H]-thymidine incorporation. (b) C57BL/6 mice (*n*=6 per group) were inoculated with 2 × 10<sup>4</sup> of EG7 cells in a total volume 200 μl subcutaneously. After 3 days, 10 μg of rOVA, rIipo-OVA, rIipo-OVA/CpG or PBS was injected s.c. Tumor growth was observed three times per week. The tumor volume was shown as length × width × width/2 (mm<sup>3</sup>). Data are expressed as mean ± SEM.
